# Supplementary material for: Testosterone is an endogenous regulator of BAFF and splenic B cell number
Source: Springer Nature journal article supplement (doi:10.1038/s41467-018-04408-0), 2018-05-21
Supplement: 41467_2018_4408_MOESM1_ESM.pdf [file 41467_2018_4408_MOESM1_ESM.pdf]

## SUPPLEMENTARY INFORMATION

### **Testosterone is an endogenous regulator of BAFF and splenic B cell number**

Wilhelmson et al.

---

## SUPPLEMENTARY FIGURES

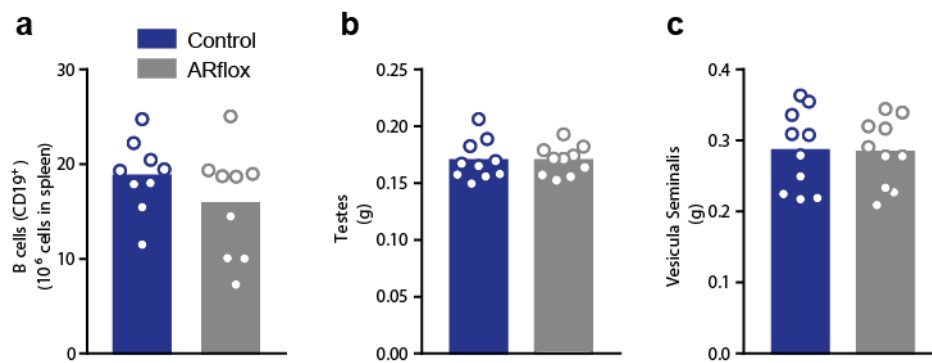

**Supplementary Figure 1. Number of splenic B cells and weights of reproductive organs in ARflox mice.** (a) Number of CD19<sup>+</sup> B cells in spleen from control ( $Ar^{+}$ ) and  $Ar^{flox}$  male mice;  $n = 9$ /group. (b-c) Weight of testes (b) and seminal vesicles (c) in control ( $Ar^{+}$ ) and  $Ar^{flox}$  male mice;  $n = 10$ /group. All bars indicate means; circles represent individual mice.

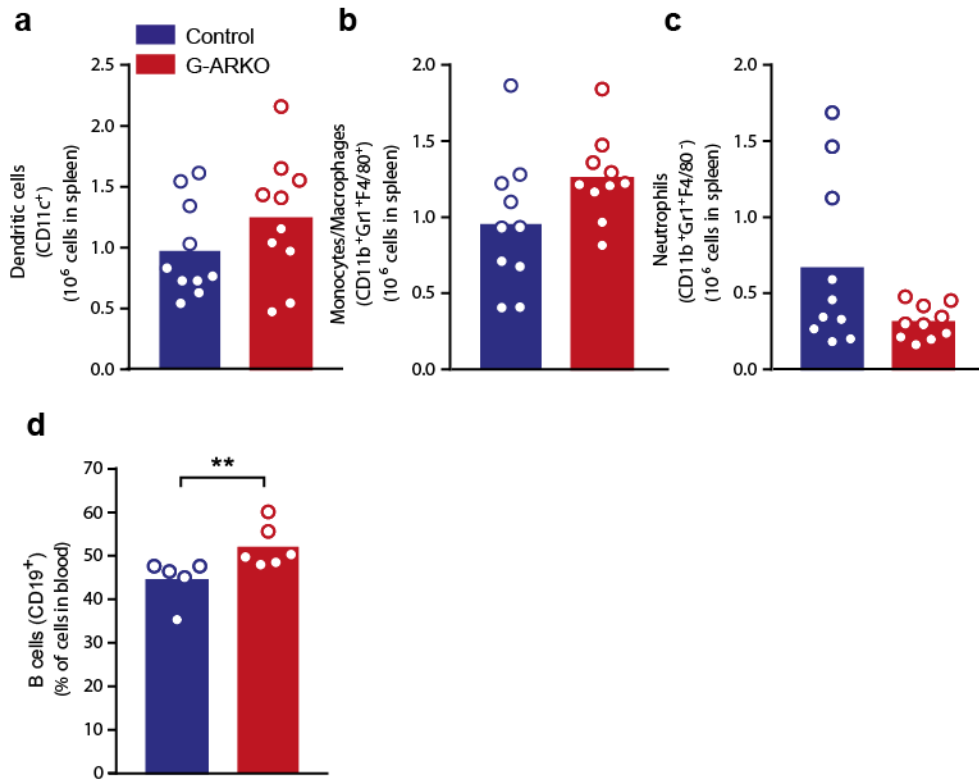

**Supplementary Figure 2. Immune cells in G-ARKO mice.** (a) Number of CD11c<sup>+</sup> dendritic cells, (b) CD11b<sup>+</sup>Gr1<sup>+</sup>F4/80<sup>+</sup> monocytes/macrophages, and (c) CD11b<sup>+</sup>Gr1<sup>+</sup>F4/80<sup>-</sup> neutrophils in spleen from control (*Pgk-Cre*<sup>+</sup>) and general androgen receptor knockout (G-ARKO) male mice. *n* = 10/group. (d) Percent CD19<sup>+</sup> B cells in blood from control (*n* = 5) and G-ARKO (*n* = 6) male mice. All bars indicate means; circles represent individual mice. \*\**P* < 0.01 (Mann-Whitney test).

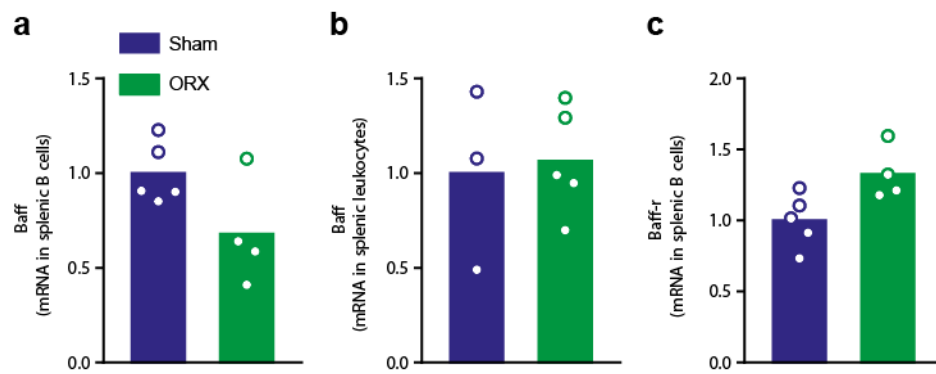

**Supplementary Figure 3. The effect of castration on splenic *Baff* and *Baff-r* mRNA.** (a-b) *Baff* mRNA in sorted splenic CD19<sup>+</sup> B cells (a) and other (CD19<sup>+</sup>CD45<sup>+</sup>) splenic leukocytes (b) from sham-operated ( $n = 5$  and  $3$ , respectively) and castrated (ORX;  $n = 4$  and  $5$ , respectively) male mice. (c) *Baff-r* mRNA levels in sorted splenic B cells from sham-operated controls ( $n = 5$ ) and castrated ( $n = 4$ ) male mice. All bars indicate means; circles represent individual mice.

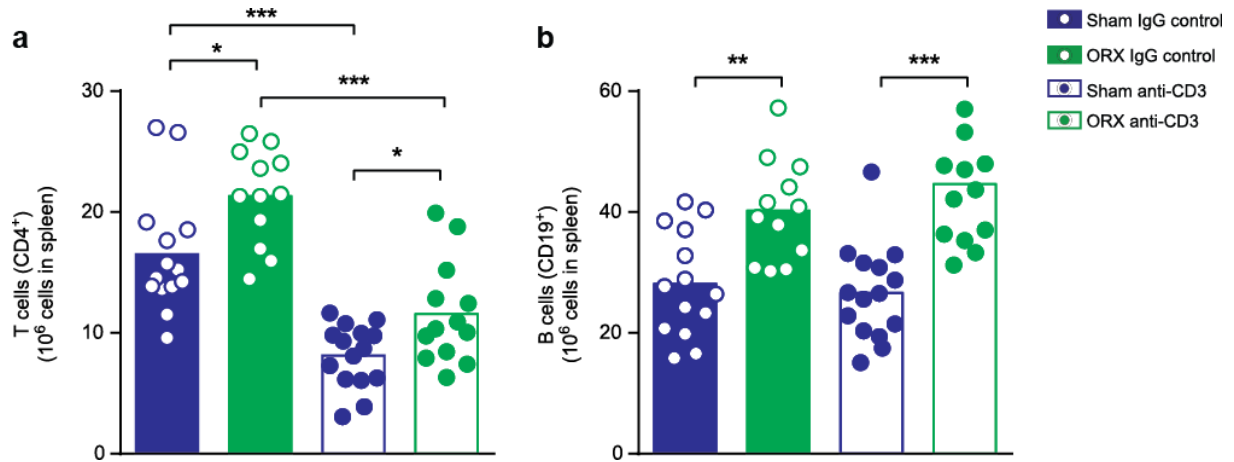

**Supplementary Figure 4. Antibody-mediated T cell depletion does not alter the effect of castration on splenic B cell number.** (a) T cells (CD4<sup>+</sup>) and (b) B cells (CD19<sup>+</sup>) in spleen in control IgG-treated and anti-CD3-treated sham-operated or castrated (ORX) male mice at 16 weeks of age; 2 weeks after last antibody injection. Surgery was performed at 4 weeks of age and antibody injections given from 5 weeks of age, with 3-week intervals.  $n = 12-15$ /group. All bars indicate means; circles represent individual mice. \* $P < 0.05$ , \*\* $P < 0.01$ , \*\*\* $P < 0.001$  (Kruskal-Wallis followed by Mann-Whitney test).

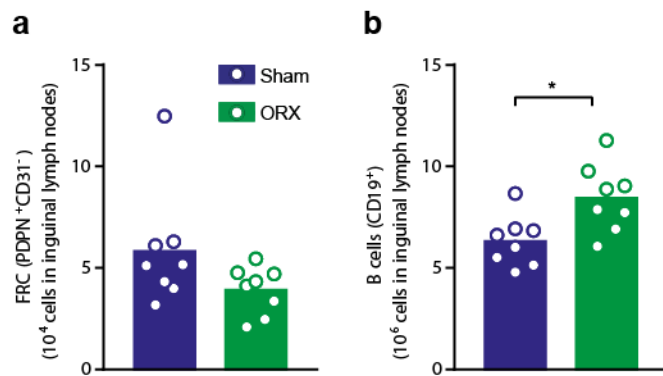

**Supplementary Figure 5. The effect of castration on numbers of FRCs and B cells in lymph nodes.** Number of (a) fibroblastic reticular cells (FRCs; CD45<sup>-</sup>PDPN<sup>+</sup>CD31<sup>-</sup>) and (b) B cells (CD19<sup>+</sup>) in inguinal lymph nodes from sham-operated and castrated (ORX) male mice.  $n = 8$ /group. All bars indicate means; circles represent individual mice.  $*P < 0.05$  (Mann-Whitney test).

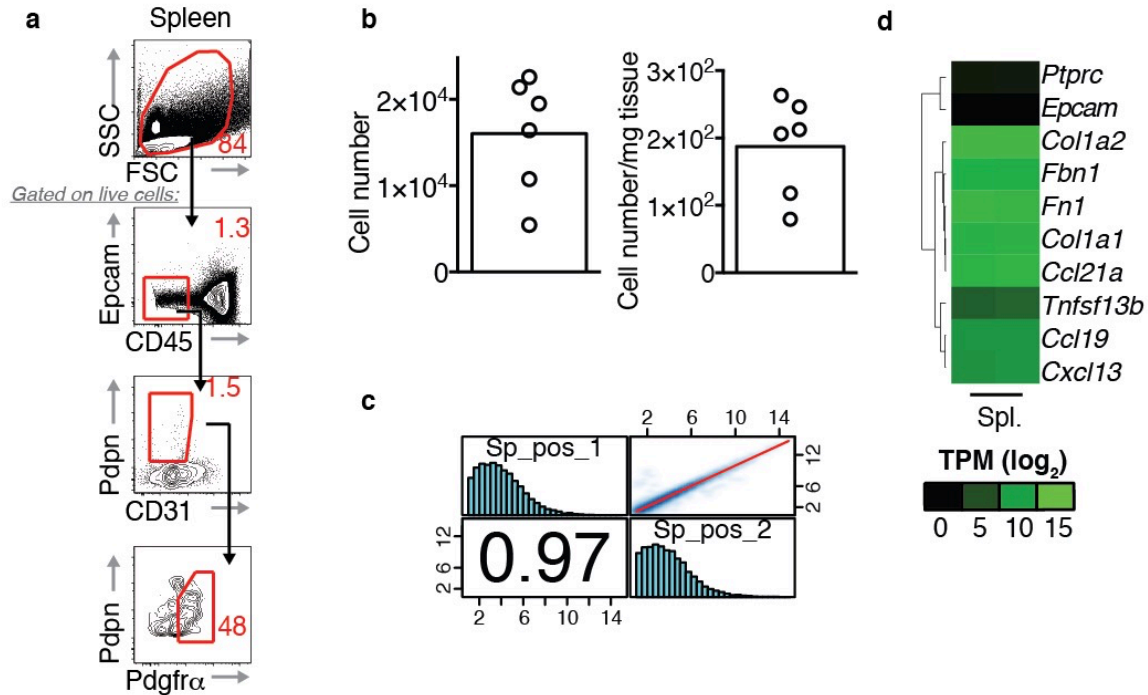

**Supplementary Figure 6. Gene expression in splenic FRCs.** (a) Gating strategy and representative flow cytometry plots used to sort splenic fibroblastic reticular cells (FRC); numbers in red denote frequency of gated cells. (b) Number of live, CD45<sup>+</sup>CD31<sup>+</sup>PDPN<sup>+</sup> FRCs from spleen and number of FRCs per milligram of tissue. Data are from two experiments. Each dot represents one mouse. (c) Similarity matrix between RNAseq samples. Lowly expressed genes were removed (below 1 transcripts per million, TPM) and (TPM + 1) values were then log<sub>2</sub> transformed. Pairwise Spearman correlation statistics were calculated among all samples and reported here (lower left). (d) Expression of fibroblast and FRC genes in sorted splenic FRC. Corresponding data on adrenergic receptor expression presented in Fig. 6a.

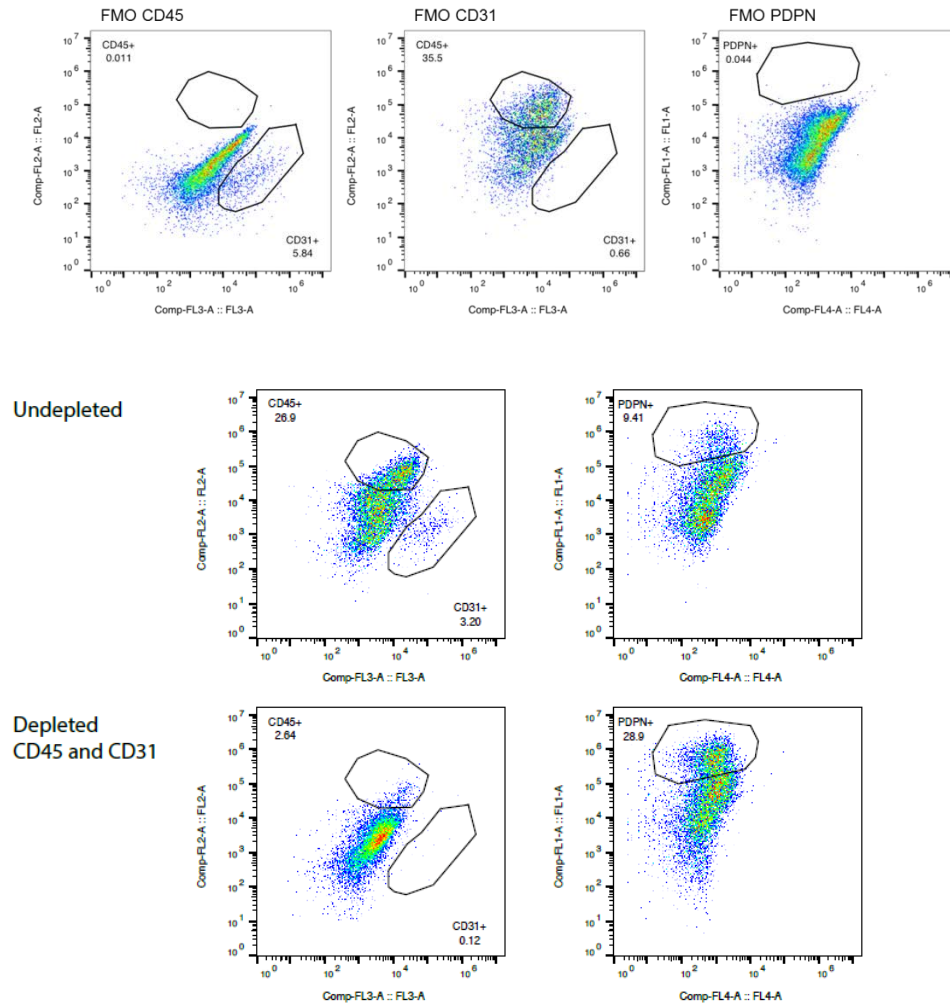

**Supplementary Figure 7. Splenic fibroblastic reticular cell (FRC) culture *in vitro*.** Splensens from wild-type male mice were digested and after culture for 6 days, cells were enriched for nonhematopoietic and nonendothelial cells with anti-CD31 and anti-CD45 microbeads. The stromal cell composition was assessed by flow cytometry for CD31, CD45, and PDPN before and after enrichment.



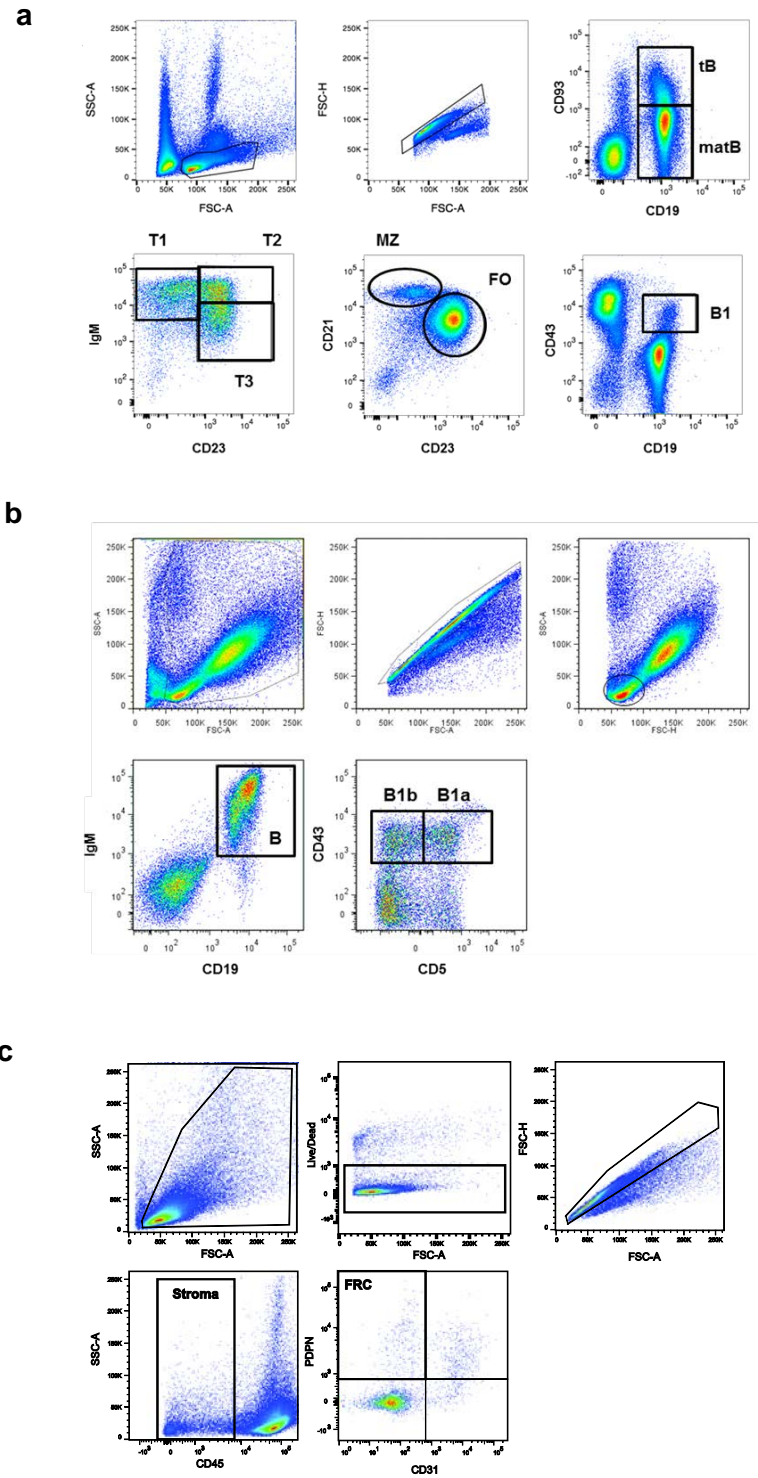

**Supplementary Figure 8. Gating strategies.** (a) Splenic B cells (data in Fig. 1b-c, 1e-j, 2a-d, 3h-k, 6h). Nucleated cells were gated to exclude red blood cells; smaller fragments and nonsingle cells were excluded. Transitional B cells (tB) were identified as  $CD19^+CD93^+$  and mature B cells (matB) as  $CD19^+CD93^-$ . These were further divided into T1–3 cells by IgM and CD23 expression and follicular (FO) and marginal zone (MZ) B cells by CD21 and CD23 expression. B1 cells were identified as  $CD19^+CD43^+$ . (b) Peritoneal B cells (data in Fig. 1d). Nucleated cells were gated to exclude red blood cells; smaller fragments and nonsingle cells were excluded. Lymphocytes were selected and gated for IgM.  $CD19^+$  B cells were identified as  $CD19^+IgM^+$ , B1a cells as  $CD43^+CD5^+$ , and B1b cells as  $CD43^+CD5^-$ . (c) Splenic FRCs (data in Fig. 5d-f, 6b). Smaller fragments, dead cells, and nonsingle cells were excluded. Stromal cells were identified as  $CD45^-$  and of these FRCs (fibroblastic reticular cells) were identified as  $PDPN^+CD31^-$ .

**SUPPLEMENTARY TABLES****Supplementary Table 1.** Characteristics of eugonadal and hypogonadal men

| <b>Characteristics</b>               | <b>Eugonadal<br/>(<i>n</i> =114)</b> | <b>Hypogonadal<br/>(<i>n</i> = 12)</b> | <b><i>P</i> value</b> |
|--------------------------------------|--------------------------------------|----------------------------------------|-----------------------|
| Age (years)                          | 36 ± 8                               | 42 ± 8                                 | 0.006                 |
| Body mass index (kg/m <sup>2</sup> ) | 25 ± 3                               | 27 ± 4                                 | 0.022                 |
| Total testosterone (nmol/L)          | 19 ± 5                               | 10 ± 6                                 | <0.0001               |
| Free testosterone (nmol/L)           | 0.38 ± 0.08                          | 0.18 ± 0.03                            | <0.0001               |

Values are means ± s.d. P-values are from t-test.

**Supplementary Table 2.** Primers used for genotyping

| Gene                     | Type | Primer sequence (5'-3')    |
|--------------------------|------|----------------------------|
| <i>Ar</i> (exon 2 locus) | F    | AGCCTGTATACTCAGTTGGGG      |
|                          | R    | AATGCATCACATTAAGTTGATACC   |
| <i>Cre</i>               | F    | AACATGCTTCATCGTCGG         |
|                          | R    | TTCGGATCATCAGCTACACC       |
| <i>Zfy</i>               | F    | AAGATAAGCTTACATAATCACATGGA |
|                          | R    | CCTATGAAATCCTTTGCTGCACATGT |

We assessed *Ar*<sup>1</sup> and *Cre* genotypes using PCR amplification of genomic DNA. Male sex (presence of the Y chromosome) was confirmed by detection of the *Zfy* gene<sup>1</sup>.

## REFERENCES

1. De Gendt, K., *et al.* A Sertoli cell-selective knockout of the androgen receptor causes spermatogenic arrest in meiosis. *Proc Natl Acad Sci U S A* **101**, 1327-1332 (2004).
